# Supplementary material for: Assessing the Relationship Between Gastrointestinal and Pancreatic Neuroendocrine Tumor Grade and Overall Survival: A Systematic Review and Meta-Analysis
Source: Preprints.org preprint supplement (doi:10.20944/preprints202303.0060.v1), 2023-03-03

**Supplemental file: Table 1: NOS Scale**

| **Studies** | **Selection** | **Comparability** | **Outcome** | **Overall Quality/ Overall risk of bias** |
| --- | --- | --- | --- | --- |
| **Folkestead et al., 2020** | **++** | **+** | **++** | High |
| **Tan et al., 2020** | **++** | **+** | **++** | Moderate |
| **Liu et al. 2020** | **+++** | **++** | **+++** | Low |
| **Kim et al, 2015** | **+++** | **++** | **+++** | Low |
| **Ptasnuka et al, 2019** | **+++** | **++** | **++** | Low |
| **Pellat A et al, 2019** | **++** | **++** | **++** | Moderate |
| **Yang et al., 2018** | **+++** | **++** | **+++** | Low |
| **Fathi et al., 2020** | **++** | **++** | **++** | High |
| **Cetinkaya et al.,2014** | **++** | **+** | **+++** | Moderate |
| **Zang et al., 2014** | **+++** | **++** | **+++** | Low |
| **Fang et al., 2017** | **+++** | **++** | **+++** | Low |
| **Foubert, 2018** | **++** | **+** | **++** | High |
| **Sakin, 2018** | **+++** | **++** | **+** | Moderate |
| **Rosenblum et al., 2020** | **+++** | **++** | **+++** | Low |

**Figures: Funnel plots and forest plot after sensitivity analysis:**

1. **Age and Survival.**


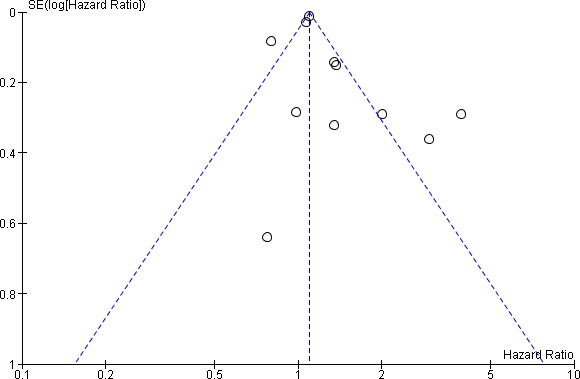
**Funnel plot for outlying studies**


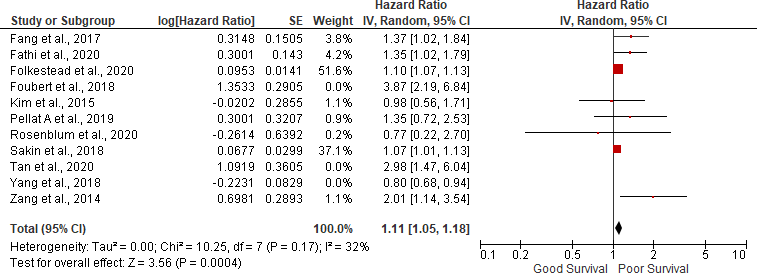
Forest plot of age and survival after sensitivity analysis:

# Grade 3


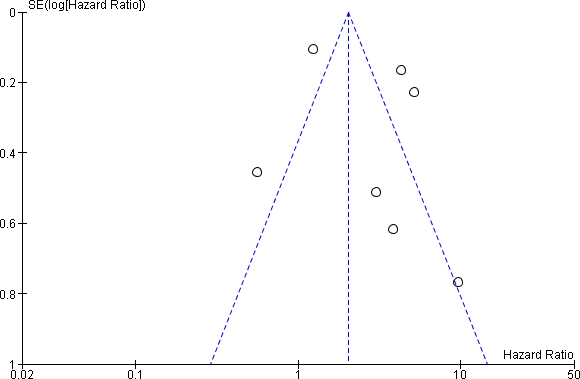
Funnel plot for outlying studies


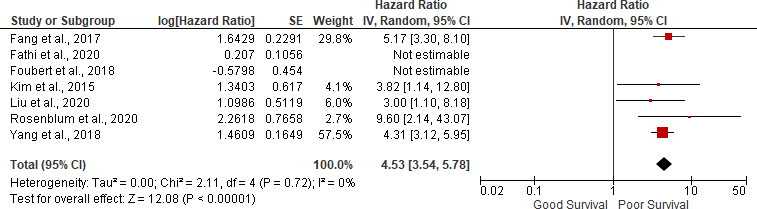
Forest plot of Grade and survival after sensitivity analysis

1. **Lymph node positivity**

Funnel plot for outlying studies


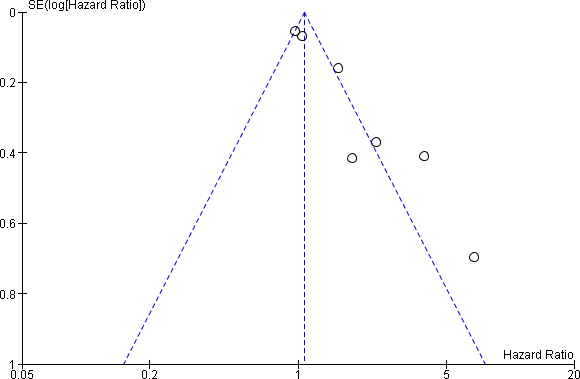


Forest plot of Lymph node positivity and survival after sensitivity analysis:


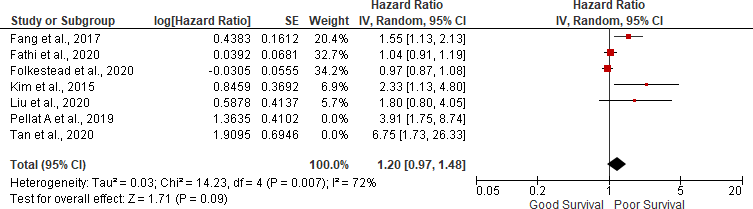


1. **Ki-67 more than 5%**

Funnel plot for outlying studies


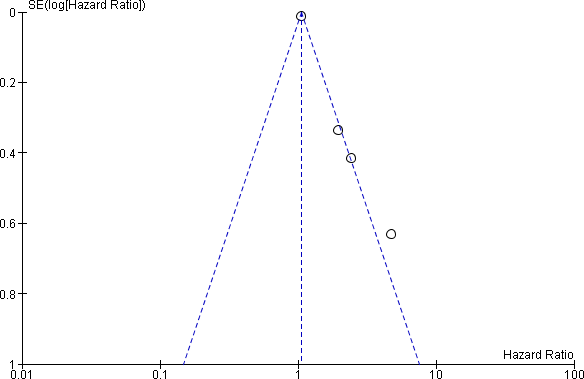


Forest plot of ki67 more than 5% and survival after sensitivity analysis:


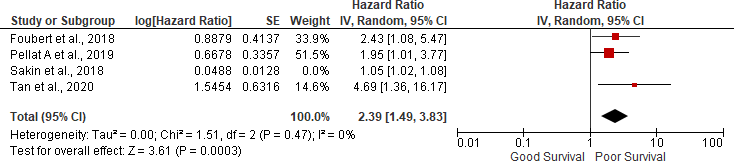

Supplement: Supplementary file 1 [file supplementary]
